# Supplementary figures and images for: Photodegradation of antihistamine chlorpheniramine using a novel iron-incorporated carbon material and solar radiation
Source: Royal Society of Chemistry journal article supplement (doi:10.1039/d0ew00413h), 2020-01-01

Supplementary data

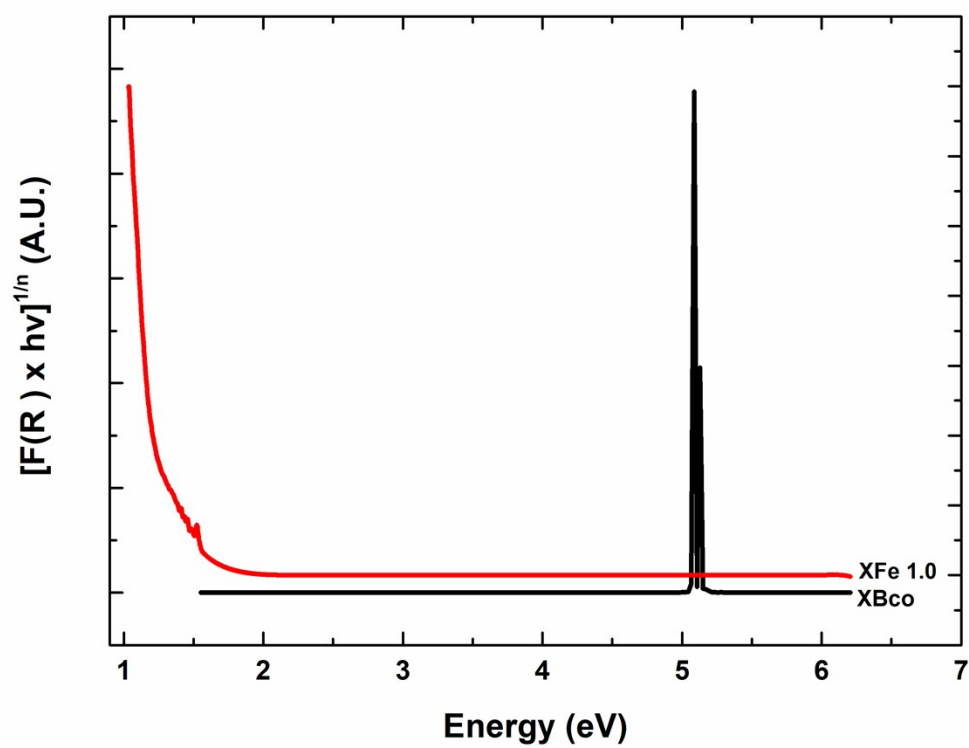

Figure S1 Band-gap diagram for the XFe 1.0 and XBco materials

Supplement: d0ew00413h1.pdf [file d0ew00413h1.pdf]
